# Supplementary material for: The Relationship Between Autonomy-supporting Coaching and Interruption Intention: Verification of the Mediating Effect of Emotional Intelligence
Source: Preprints.org preprint supplement (doi:10.20944/preprints202104.0763.v1), 2021-04-28
Supplement: Supplementary file 1 [file supplementary]

**Table 1. Correlation coefficient between measurement variables**

| Variable                     | A        | B        | C         | D         | E         | F         |
|------------------------------|----------|----------|-----------|-----------|-----------|-----------|
| Autonomy support coaching(A) | 1.00     |          |           |           |           |           |
| Self-emotion(B)              | .291**   | 1.00     |           |           |           |           |
| Others'emotion(C)            | .373**   | .562**   | 1.00      |           |           |           |
| Use of emotion(D)            | .423**   | .563**   | .446**    | 1.00      |           |           |
| Regulation of emotion(E)     | .250**   | .323**   | .328**    | .485*     | 1.00      |           |
| Interruption Intention(F)    | -.442**  | -.266**  | -.187**   | -.375**   | -.200**   | 1.00      |
| M±SD                         | 4.03±.66 | 4.83±.88 | 5.07±1.02 | 4.96±1.03 | 4.94±1.31 | 2.491±.97 |
| Skewness                     | -.23     | .17      | .22       | .01       | -.31      | .31       |
| Kurtosis                     | -.53     | .59      | -.75      | .05       | .30       | -.49      |

\*p<.05, \*\*p<.01

**Table 2. Estimated value of path coefficient of measurement model**

| Route                                                 | Estimate | S.E  | C.R    | <i>p</i> | SRW   | SMC  |
|-------------------------------------------------------|----------|------|--------|----------|-------|------|
| Emotional intelligence←Autonomy support coaching      | .398     | .072 | 5.550  | .001     | .449  | .202 |
| Interruption intention←Autonomy support coaching      | -.398    | .104 | -3.809 | .001     | -.302 | .211 |
| Interruption intention←Emotional intelligence         | -.350    | .127 | -2.747 | .01      | -.236 | .211 |
| Autonomy support coaching 8←Autonomy support coaching | 1.000    |      |        |          | .882  | .835 |
| Autonomy support coaching 7←Autonomy support coaching | 1.070    | .059 | 18.132 | .000     | .936  | .765 |
| Autonomy support coaching 6←Autonomy support coaching | .846     | .059 | 14.284 | .000     | .779  | .782 |
| Self-emotion←Emotional intelligence                   | 1.000    |      |        |          | .731  | .282 |
| Others'emotion←Emotional intelligence                 | 1.052    | .127 | 8.275  | .000     | .658  | .602 |
| Use of emotion←Emotional intelligence                 | 1.254    | .137 | 9.154  | .000     | .776  | .434 |
| Regulation of emotion←Emotional intelligence          | 1.086    | .159 | 6.824  | .000     | .531  | .534 |
| Interruption intention 6←Interruption intention       | 1.000    |      |        |          | .884  | .607 |
| Interruption intention 7←Interruption intention       | 1.013    | .058 | 17.605 | .000     | .874  | .876 |
| Interruption intention 8←Interruption intention       | 1.096    | .058 | 18.778 | .000     | .914  | .777 |

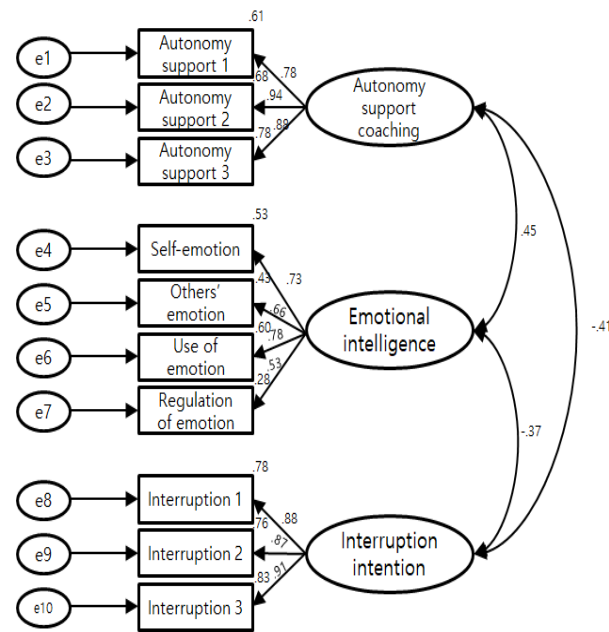

**Fig 1. Analysis of measurement model among variables**

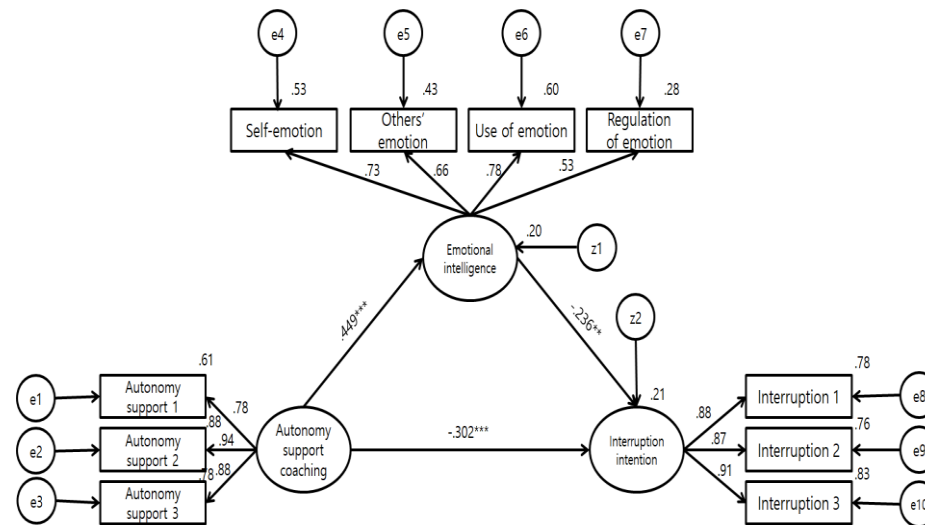

**Fig 2. Mediating Effect Model of Emotional Intelligence in the Relationship between Autonomy Supporting Coaching Type and Interruption intention**
